# Supplementary material for: A Randomized Controlled Trial Investigating the Effects of a Low–Glycemic Index Diet on Pregnancy Outcomes in Gestational Diabetes Mellitus
Source: PubMed Central journal article supplement — Diabetes Care. 2011 Oct 15;34(11):2341–6. doi: 10.2337/dc11-0985 (PMC3198285; doi:10.2337/dc11-0985), 2011-10-15

SUPPLEMENTARY DATA

**Supplementary Table 1 – Sample menu for the two study diets**

|                             | <b>LGI diet</b>                                                                                                                     | <b>HF diet</b>                                                                                                      |
|-----------------------------|-------------------------------------------------------------------------------------------------------------------------------------|---------------------------------------------------------------------------------------------------------------------|
| Breakfast                   | 1 slice soy & linseed bread <sup>a</sup><br>2 tsp reduced fat margarine<br>1 large fried egg<br>250 mL skim milk<br>1 medium orange | 2 slices wholemeal bread<br>250 mL skim milk<br>1 large fried egg<br>1 tsp reduced fat margarine<br>1 medium orange |
| Morning Tea                 | 1 low GI muesli bar <sup>b</sup>                                                                                                    | 3 plain water crackers<br>30g cheese spread                                                                         |
| Lunch                       | 1 cup cooked wholemeal pasta<br>1 cup beef meatball stew in tomato sauce<br>0.5 cup mixed vegetables                                | 2 cups beef and vegetable soup<br>2 slices wholemeal bread<br>1 cup mixed vegetables                                |
| Afternoon Tea               | 150 g skim fruit yoghurt                                                                                                            | 1 slice wholemeal bread<br>2 tsp honey                                                                              |
| Dinner                      | 1 cup minestrone soup<br>2 tsp olive oil<br>1 slice soy & linseed bread <sup>a</sup><br>1 medium mandarin                           | 125 g plain risotto<br>100 g chicken breast<br>1.5 cup broccoli flowerets                                           |
| Supper                      | 150 g skim fruit yoghurt                                                                                                            | 150g skim fruit yoghurt                                                                                             |
| <b>Nutritional analyses</b> |                                                                                                                                     |                                                                                                                     |
| Energy (kJ)                 | 6980                                                                                                                                | 7062                                                                                                                |
| Protein (%)                 | 25                                                                                                                                  | 28                                                                                                                  |
| Fat (%)                     | 28                                                                                                                                  | 24                                                                                                                  |
| CHO (%)                     | 42                                                                                                                                  | 44                                                                                                                  |
| Dietary Fiber (g)           | 33                                                                                                                                  | 30                                                                                                                  |
| Glycemic index              | 41                                                                                                                                  | 60                                                                                                                  |
| Glycemic load               | 70                                                                                                                                  | 106                                                                                                                 |

<sup>a</sup>Burgen® Soy & Lin bread; Tip Top Bakeries, Australia

<sup>b</sup>Uncle Toby's® Crunchy Nut Crumble muesli bar; Uncle Toby's, Australia

**Supplementary Table 2 – Foods in sample baskets**

| <b>Low GI diet</b>                           | <b>GI</b> | <b>High fiber diet</b>                  | <b>GI</b> |
|----------------------------------------------|-----------|-----------------------------------------|-----------|
| Kellogg's® Guardian cereal                   | 37        | Uncle Toby's® Vita Brits                | 65        |
| SunRice® Doongara™ Rice                      | 48        | Arnott's® Vita Wheat crispbread         | 55*       |
| Burgen® Soy & Linseed bread                  | 52        | Sun Rice® Calrose rice (white or brown) | 83        |
| Uncle Toby's® Crunchy Nut Crumble Muesli Bar | 51        | Uncle Toby's® Bodywise™ Muesli Bar      | 63        |
| Edgell® Four Bean Mix                        | 37        | Tip Top® 100% Wholegrain                | 70*       |
| San Remo® Wholemeal Pasta                    | 42*       |                                         |           |

GI – glycemic index; GI values obtained from Atkinson *et al* Diabetes Care 2008;31:2281-3, GlycemicIndex.com, and personal communications (SUGiRS 2008-2010).

\*estimated GI

SUPPLEMENTARY DATA

**Supplementary Figure 1 – Flow of subjects (CONSORT diagram)**

GI – glyceic index; HF – wholegrain high fiber

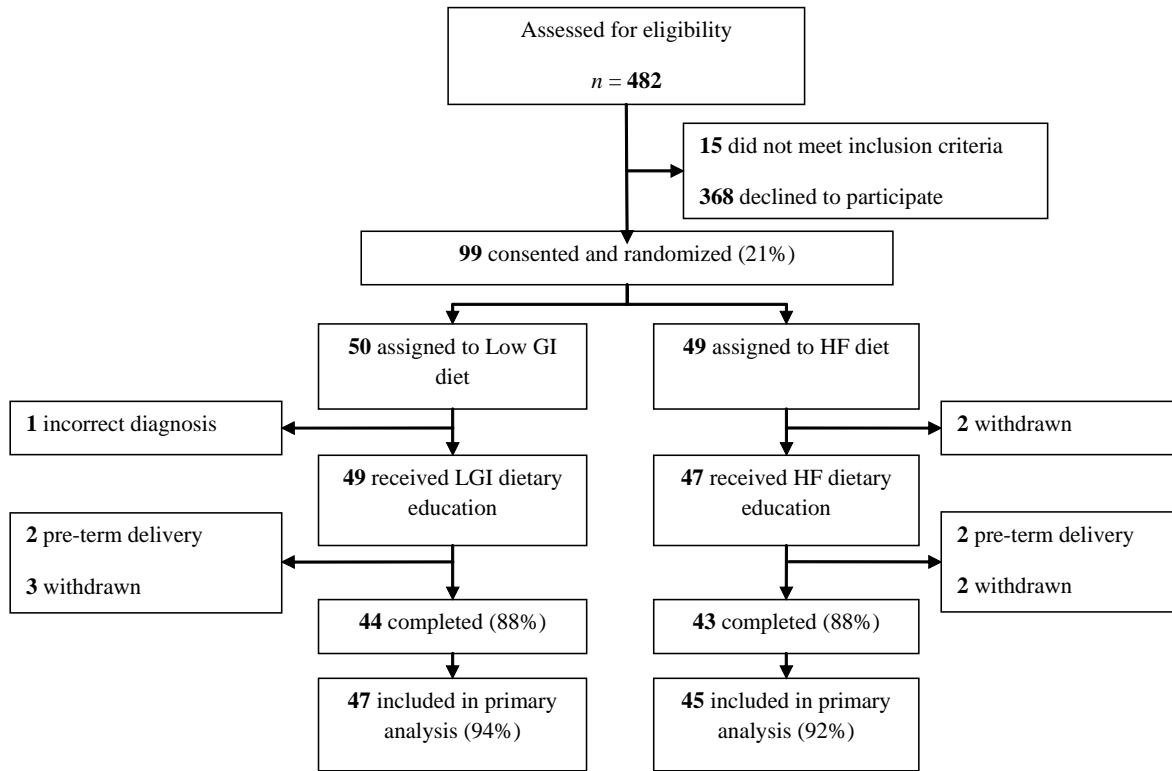

Supplement: supp_dc11-0985v110985_DC110985SupplementaryData.pdf [file supp_dc11-0985v110985_DC110985SupplementaryData.pdf]
